# Supplementary material for: Edge-carboxylated graphene anchoring magnetite-hydroxyapatite nanocomposite for an efficient 4-nitrophenol sensor
Source: Royal Society of Chemistry journal article supplement (doi:10.1039/c4ra16035e), 2015-01-01
Supplement: c4ra16035e1.pdf [file c4ra16035e1.pdf]

## Supplementary Information

### **Edge-carboxylated graphene anchoring magnetite-hydroxyapatite nanocomposite for efficient 4-nitrophenol sensor†**

G. Bharath<sup>a</sup>, Vediappan Veeramani<sup>b</sup>, Shen-Ming Chen<sup>b</sup>, Rajesh Madhu<sup>b</sup>, M. Manivel Raja<sup>c</sup>,  
A. Balamurugan, D. Mangalaraj,<sup>a</sup> C. Viswanathan,<sup>a</sup> N. Ponpandian<sup>\*,a</sup>

<sup>a</sup>Department of Nanoscience and Technology, Bharathiar University, Coimbatore 641 046, India.

<sup>b</sup>Electroanalysis and Bioelectrochemistry Lab, Department of Chemical Engineering and Biotechnology, National Taipei University of Technology, Taiwan.

<sup>c</sup>Defence Metallurgical Research Laboratory, Kanchanbaugh, Hyderabad 500 058, India

*Corresponding author, E-mail: ponpandian@buc.edu.in*

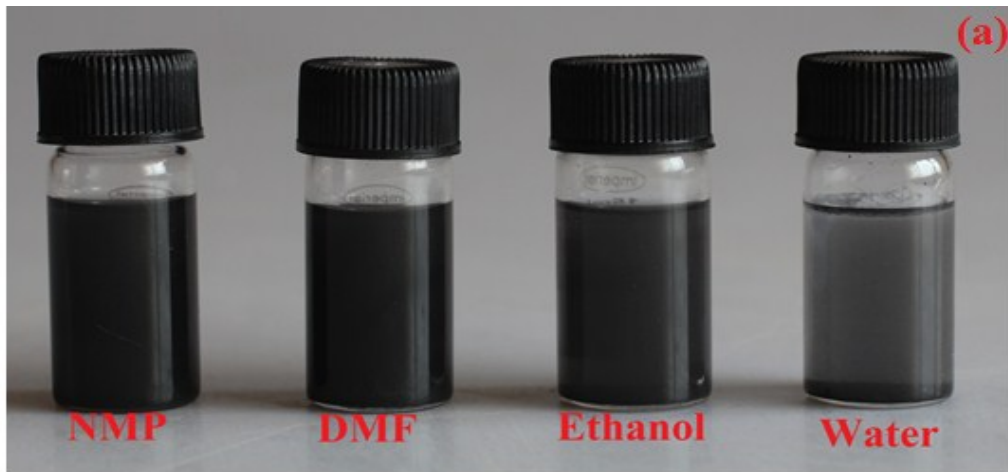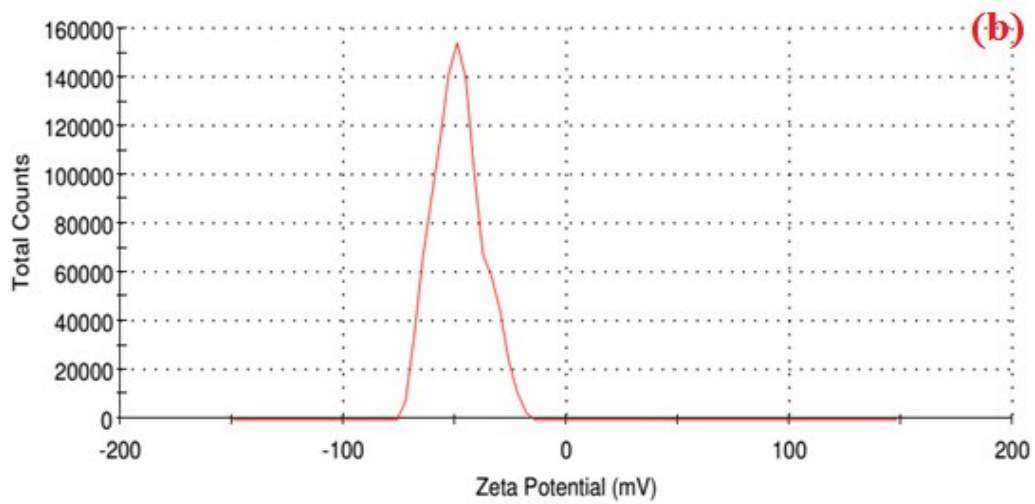

**ESI Fig. 1** (a) Dispersion of edge-carboxylated graphene with different exfoliating solvents of water, ethanol, DMF and NMP and (b) Zeta potential of ECG sheets in water with the concentration of 0.1 mg/mL.

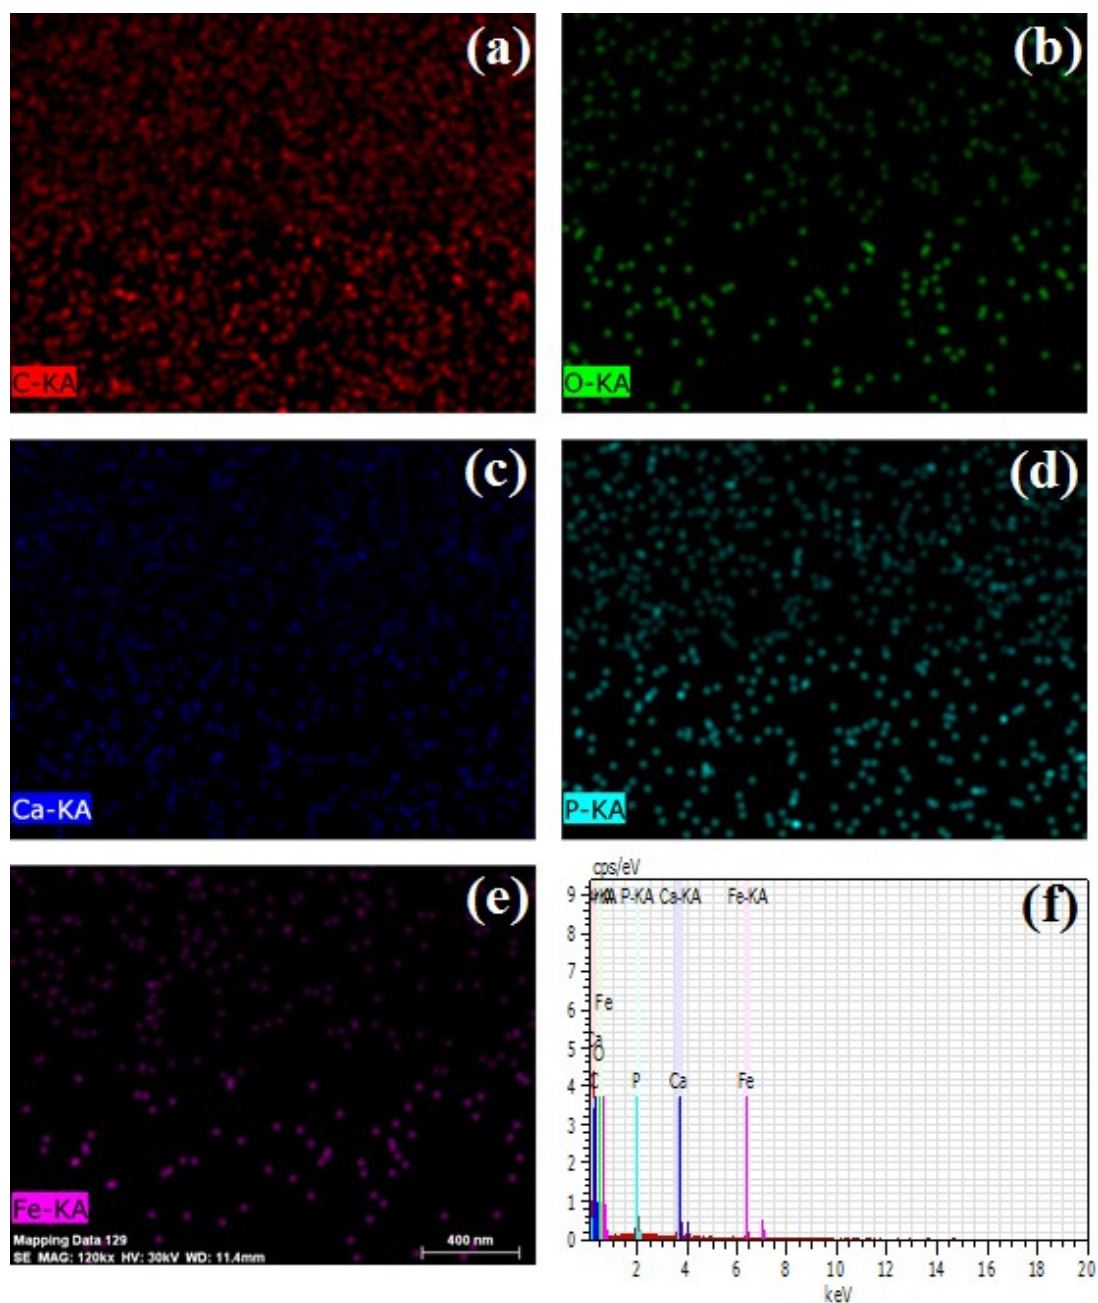

**ESI Fig. 2** EDX spectrum and elemental mapping of mHAp/ECG nanocomposite. (a-e) elemental mapping of carbon (C), oxygen (O), calcium (Ca), phosphate (P) and iron (Fe) species. (f) EDX spectrum of mHAp/ECGs nanocomposite.

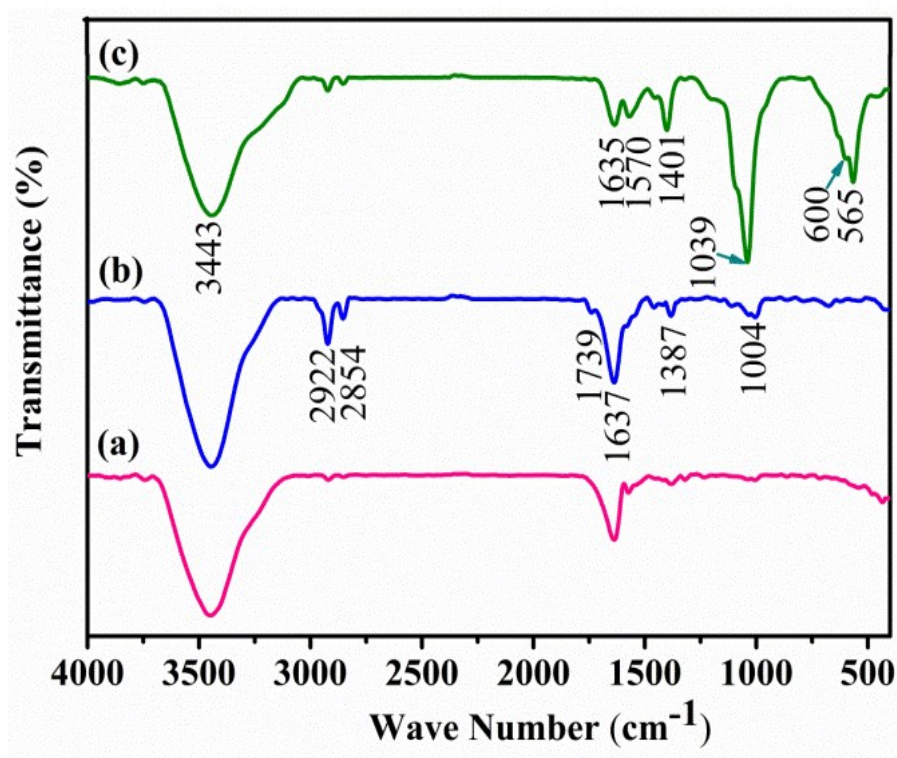

**ESI Fig. 3** FTIR spectra for (a) pure natural graphite flakes, (b) ball milled edge-carboxylated graphene sheets and (c) mHAp/ECG nanocomposites

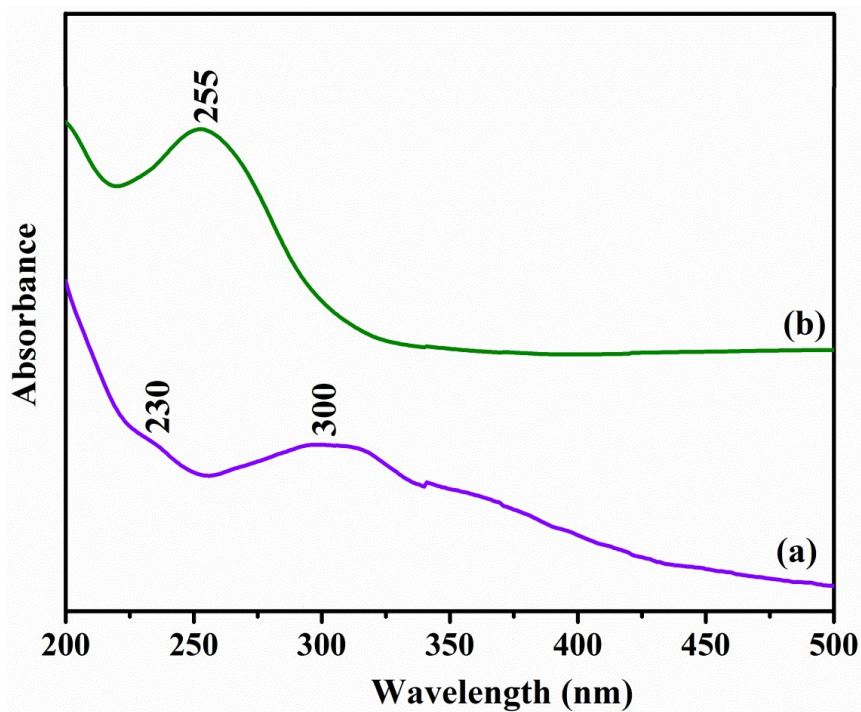

**ESI Fig. 4** The UV-vis absorption spectra for (a) edge-carboxylated graphene sheets and (b) mHAp/ECG nanocomposite with the concentration of 0.1 mg/mL.



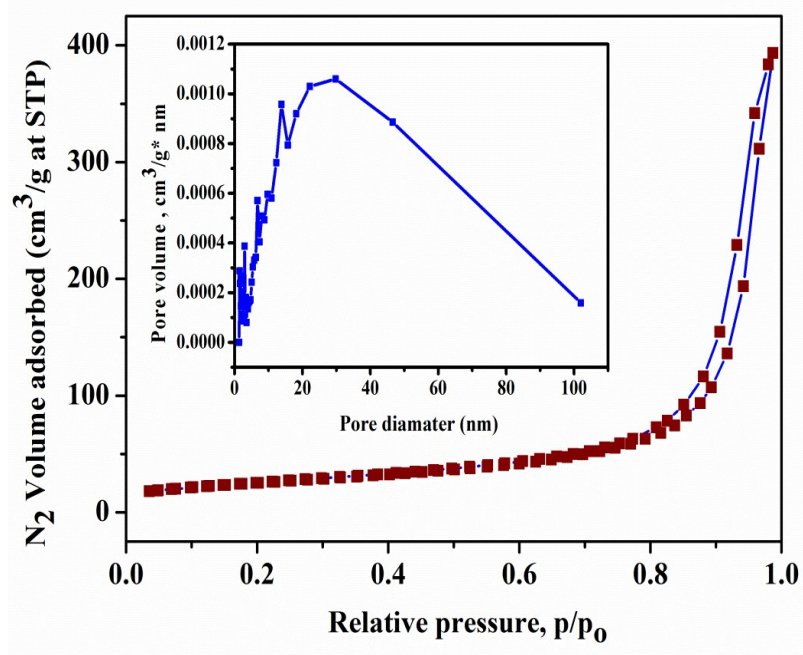

ESI Fig. 5 Nitrogen-adsorption/desorption isotherms and the inset shows the pore-size distribution of the mHAp/ECG nanocomposite

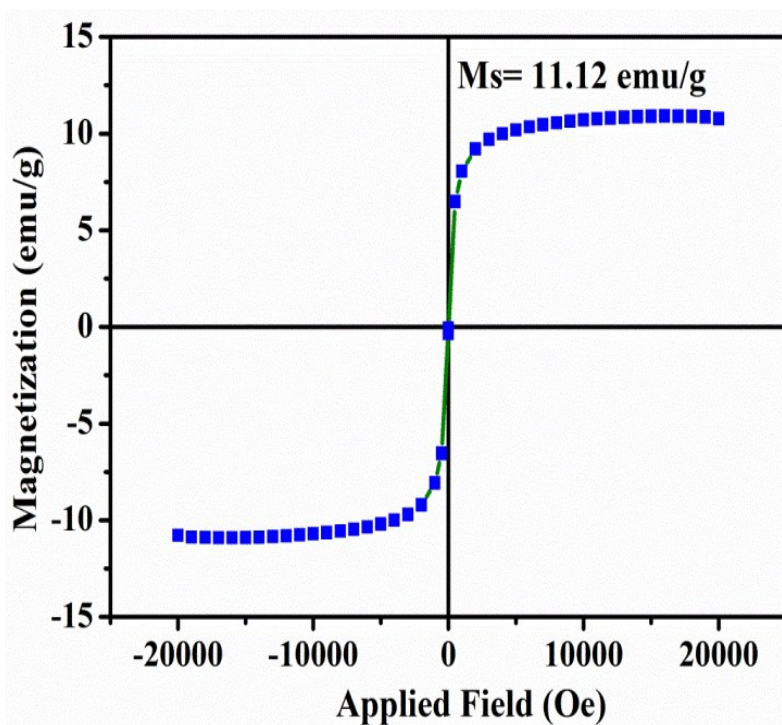

ESI Fig. 6 Magnetic hysteresis loop for the m-HAp/ECG nanocomposite at room temperature.

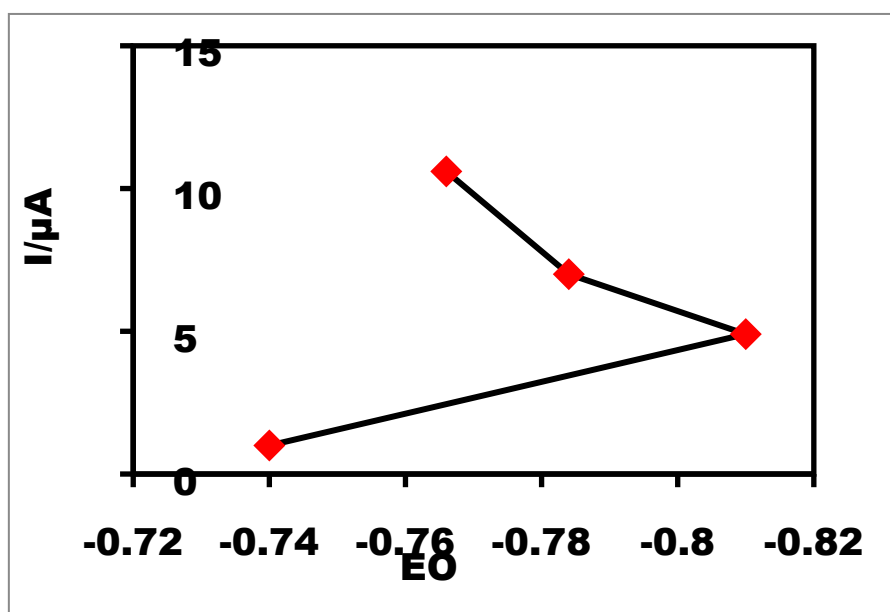

ESI Fig. 7 Calibration plot for  $E_0$  vs current density of Fig. 9.

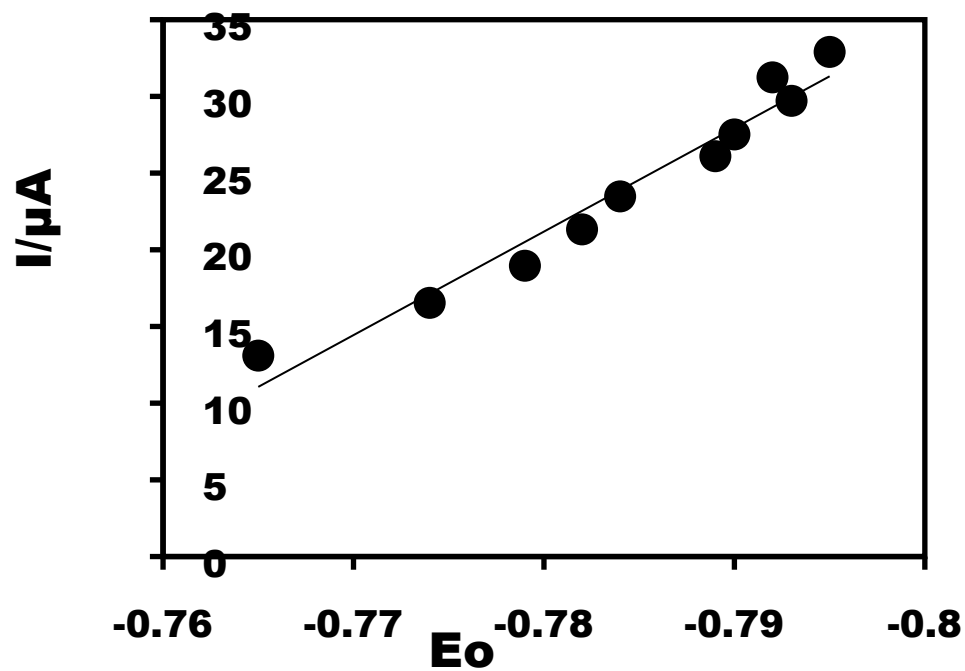

ESI Fig. 8 Calibration plot for  $E_0$  vs current density of Fig. 10.

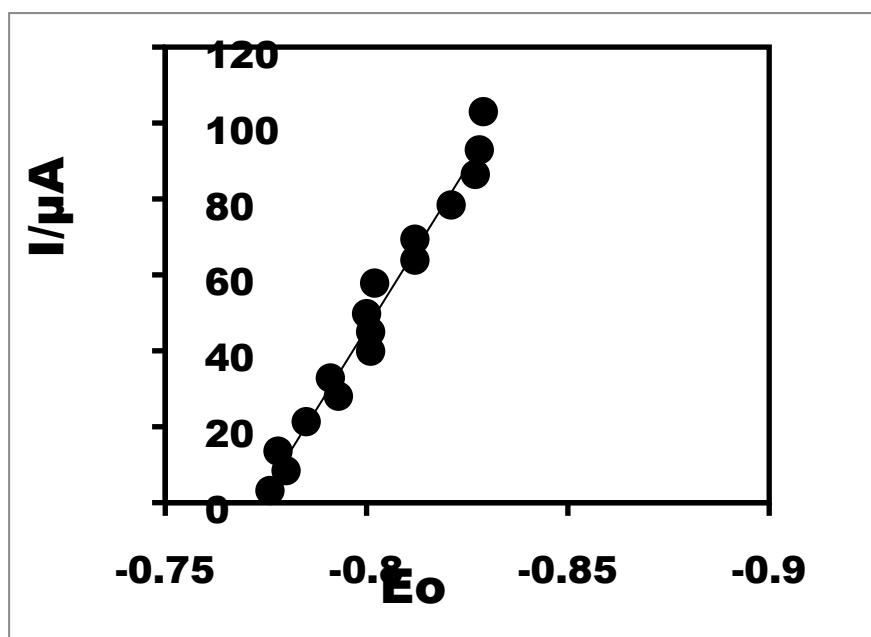

ESI Fig. 9 Calibration plot for  $E_0$  vs current density of Fig. 12 (4-NP reduction).

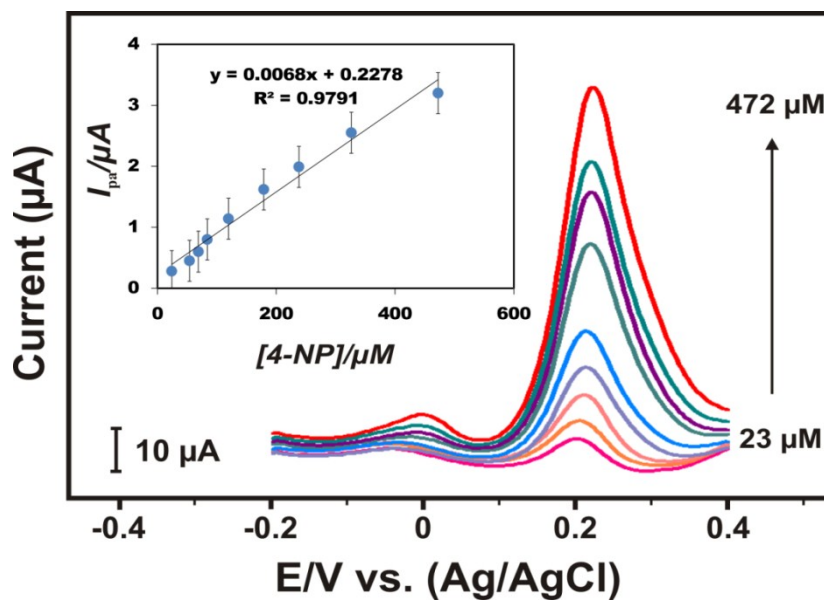

ESI Fig. 10. DPV curves of mHAp/ECG nanocomposite modified GCE under various 4-NP concentrations from 23-472  $\mu\text{M}$ . Inset; anodic oxidation peak current ( $I_{pa}$ ) vs 4-NP concentration.

Table S1. Determination of 4-NP in various water samples using DPV.

| <b>Real samples</b> | <b>Analyte</b> | <b>Added (nM)</b> | <b>Found (nM)</b> | <b>Recovery (%)</b> |
|---------------------|----------------|-------------------|-------------------|---------------------|
| <b>Tap water</b>    | 4-NP           | 50                | 48.7              | 97.4                |
|                     |                | 100               | 102.1             | 102.1               |
| <b>Rain water</b>   | 4-NP           | 50                | 49.6              | 99.2                |
|                     |                | 100               | 105.9             | 105.9               |
